# Supplementary material for: Captive breeding in the endangered alpine tree frog, Litoria verreauxii alpina
Source: PeerJ. 2023 Apr 21;11:e15179. doi: 10.7717/peerj.15179 (PMC10124539; doi:10.7717/peerj.15179)
Supplement: Supplemental Information 1 — The results of the hormone induction laboratory trial shows the breeding behaviour observed over the experiment. The outdoor mesocosm egg data shows the egg mass data including date of lay and proportion of eggs that were viable. The outdoor mesocosm mass data sheet shows the mass of the animals before and after brumation, and then at the end of the experimental period. Adult frogs were not individually marked therefore individual is not tracked for size changes over the experiment. [file peerj-11-15179-s001.xls]

## Sheet: Hormone induction
Number of males within the treament	Treatment	Amplexus observed (0 = no, 1 = yes)	Calling observed (0 = no, 1 = yes)	Days	Days_post_inject	Day of injection 1	Day of injection 2	Day of injection 3
5	Choulon-Treated	0	0	-6	-6	0	8	13
5	Choulon-Treated	0	0	0	0	0	8	13
5	Choulon-Treated	1	0	1	1	0	8	13
5	Choulon-Treated	0	0	2	2	0	8	13
5	Choulon-Treated	0	0	3	3	0	8	13
5	Choulon-Treated	0	0	7	7	0	8	13
5	Choulon-Treated	0	1	9	1	0	8	13
5	Choulon-Treated	0	0	10	2	0	8	13
5	Choulon-Treated	0	0	13	0	0	8	13
5	Choulon-Treated	0	0	27	15	0	8	13
3	Control	0	0	-6	-6	0	8	13
3	Control	0	0	0	0	0	8	13
3	Control	0	0	1	1	0	8	13
3	Control	0	0	8	0	0	8	13
3	Control	0	0	13	0	0	8	13
3	Control	0	0	18	5	0	8	13
3	Control	0	0	27	15	0	8	13
5	Lucrin-Treated	0	0	-6	-6	0	8	13
5	Lucrin-Treated	0	0	-2	-2	0	8	13
5	Lucrin-Treated	3	0	0	0	0	8	13
5	Lucrin-Treated	1	0	1	1	0	8	13
5	Lucrin-Treated	1	1	2	2	0	8	13
5	Lucrin-Treated	0	0	5	5	0	8	13
5	Lucrin-Treated	3	0	8	0	0	8	13
5	Lucrin-Treated	2	1	9	1	0	8	13
5	Lucrin-Treated	0	0	11	3	0	8	13
5	Lucrin-Treated	1	1	13	0	0	8	13
5	Lucrin-Treated	1	1	13	0	0	8	13
5	Lucrin-Treated	1	1	13	0	0	8	13
5	Lucrin-Treated	0	0	15	2	0	8	13
5	Lucrin-Treated	1	0	18	5	0	8	13
5	Lucrin-Treated	1	0	19	6	0	8	13
5	Lucrin-Treated	0	0	21	8	0	8	13
5	Lucrin-Treated	0	0	27	15	0	8	13

## Sheet: Outdoor mesocosm egg data
Date egg mass was laid	Day 0	Day 2nd release	Days after experimental start	clutch number	Mass_size	Percentage of egg that developed	Viable egg mass (yes = 1, no = 0)	Egg mass with at least 25% eggs viable (yes = 1, no = 0)
2022-07-07	2022-06-14	2022-07-24	23	1	small	0	1	0
2022-07-08	2022-06-14	2022-07-24	24	2	small	0	0	0
2022-07-14	2022-06-14	2022-07-24	30	3	small	0	0	0
2022-07-28	2022-06-14	2022-07-24	44	4	small	25	1	0
2022-07-28	2022-06-14	2022-07-24	44	5	small	25	1	0
2022-08-03	2022-06-14	2022-07-24	50	6	medium	0	0	0
2022-08-04	2022-06-14	2022-07-24	51	7	medium	0	0	0
2022-08-07	2022-06-14	2022-07-24	54	8	small	25	1	0
2022-08-09	2022-06-14	2022-07-24	56	9	small	25	1	0
2022-08-18	2022-06-14	2022-07-24	65	10	small	25	1	0
2022-08-21	2022-06-14	2022-07-24	68	11	large	75	1	1
2022-08-24	2022-06-14	2022-07-24	71	12	medium	75	1	1
2022-08-25	2022-06-14	2022-07-24	72	13	medium	75	1	1
2022-09-07	2022-06-14	2022-07-24	85	14	small	50	1	1
2022-09-08	2022-06-14	2022-07-24	86	15	large	25	1	0
2022-09-10	2022-06-14	2022-07-24	88	16	medium	50	1	1
2022-09-10	2022-06-14	2022-07-24	88	17	medium	50	1	1
2022-09-15	2022-06-14	2022-07-24	93	18	large	0	1	0
2022-09-29	2022-06-14	2022-07-24	107	19	large	0	0	0
2022-09-30	2022-06-14	2022-07-24	108	20	large	0	0	0
2022-10-12	2022-06-14	2022-07-24	120	21	small	0	0	0
2022-11-09	2022-06-14	2022-07-24	148	22	large	50	1	1
2022-11-24	2022-06-14	2022-07-24	163	23	small	0	0	0

## Sheet: Outdoor mesocosm mass data
Date	Experimental time point	Sex	SVL (mm)	Mass (g)
21_11_30	End of experiment	F	37.1	3.64
21_11_30	End of experiment	F	38.6	3.76
21_11_30	End of experiment	F	40.4	3.62
21_11_30	End of experiment	F	34.4	3.78
21_11_30	End of experiment	F	37.2	3.08
21_11_30	End of experiment	F	35.6	3.84
21_11_30	End of experiment	F	40.9	4.23
21_11_30	End of experiment	F	37.1	3.39
21_11_30	End of experiment	F	38.3	3.27
21_11_30	End of experiment	F	37.8	3.75
21_11_30	End of experiment	F	40.8	3.22
21_11_30	End of experiment	F	38.8	5.3
21_11_30	End of experiment	F	40.5	6.04
21_11_30	End of experiment	F	38.4	3.72
21_11_30	End of experiment	M	39.2	4.85
21_11_30	End of experiment	M	32.6	2.69
21_11_30	End of experiment	M	36.3	2.86
21_11_30	End of experiment	M	35.1	3.03
21_11_30	End of experiment	M	34.2	2.94
21_11_30	End of experiment	M	33.9	2.78
21_11_30	End of experiment	M	37.3	3.54
21_11_30	End of experiment	M	35.2	3.76
21_06_14	End Brumation	F	43	6.69
21_06_14	End Brumation	F	37.6	5.63
21_06_14	End Brumation	F	39.9	8.16
21_06_14	End Brumation	M	34.8	3.22
21_06_14	End Brumation	M	38.4	5.02
21_06_14	End Brumation	M	34.9	5.09
21_06_14	End Brumation	F	36.6	3.65
21_06_14	End Brumation	F	36.2	5.88
21_06_14	End Brumation	F	43	8.24
21_06_14	End Brumation	M	36.5	4.62
21_06_14	End Brumation	M	33.6	3.96
21_06_14	End Brumation	M	36	4.63
21_07_24	End Brumation	M	35	3.41
21_07_24	End Brumation	M	33.5	3.36
21_07_24	End Brumation	M	32.4	3.35
21_07_24	End Brumation	F	41.8	7.7
21_07_24	End Brumation	F	40	6.87
21_07_24	End Brumation	F	37.2	5.61
21_07_24	End Brumation	F	38.3	5.99
21_07_24	End Brumation	F	38.5	5.74
21_07_24	End Brumation	F	41.6	7.48
21_07_24	End Brumation	F	38.5	6.08
21_07_24	End Brumation	F	39.1	5.11
21_07_24	End Brumation	F	40.5	7.44
21_03_24	Pre-brumation	F	41	7.66
21_03_24	Pre-brumation	M	33.8	3.77
21_03_24	Pre-brumation	F	41.7	9.75
21_03_24	Pre-brumation	M	35.5	4.56
21_03_24	Pre-brumation	F	40.9	6.03
21_03_24	Pre-brumation	F	44.9	7.78
21_03_24	Pre-brumation	F	39.5	6.85
21_03_24	Pre-brumation	F	39.5	5.66
21_03_24	Pre-brumation	F	39.2	6.06
21_03_24	Pre-brumation	F	39.8	6.61
21_03_24	Pre-brumation	F	41.8	8.26
21_03_24	Pre-brumation	M	35.5	3.53
21_03_24	Pre-brumation	M	37.8	5.53
21_03_24	Pre-brumation	F	41.4	6.82
21_03_24	Pre-brumation	M	34.1	3.72
21_03_24	Pre-brumation	F	36.2	5.26
21_03_24	Pre-brumation	F	39.4	5.55
21_03_24	Pre-brumation	F	38.8	6.45
21_03_24	Pre-brumation	F	43.2	8.14
21_03_24	Pre-brumation	F	41.4	7.86
21_03_24	Pre-brumation	M	39	4.04
21_03_24	Pre-brumation	F	38.3	6.49
21_03_24	Pre-brumation	M	38.8	6.05
21_03_24	Pre-brumation	M	37.6	5.01
21_03_24	Pre-brumation	F	37.6	5.99
21_03_24	Pre-brumation	M	34.5	4.36
